# Supplementary material for: Widening of the fundamental gap in cluster GW for metal–molecular interfaces
Source: Royal Society of Chemistry journal article supplement (doi:10.1039/d3cp04082h), 2023-12-13
Supplement: d3cp04082h1.pdf [file d3cp04082h1.pdf]

# Electronic Supplementary Information : Widening of the Fundamental Gap in Cluster $GW$ for Metal-Molecular Interfaces

Štěpán Marek <sup>\*1</sup> and Richard Korytár <sup>†1</sup>

<sup>1</sup>Department of Condensed Matter Physics, Faculty of Mathematics and Physics,  
Charles University, Ke Karlovu 5, Praha 2, 121 16, Prague

## 1 Clustering of Pyramidal Energy Levels

Pyramidal clusters contain approximate symmetries that cause pairing/clustering of energy levels together. This clustering is shown in Fig. 1.

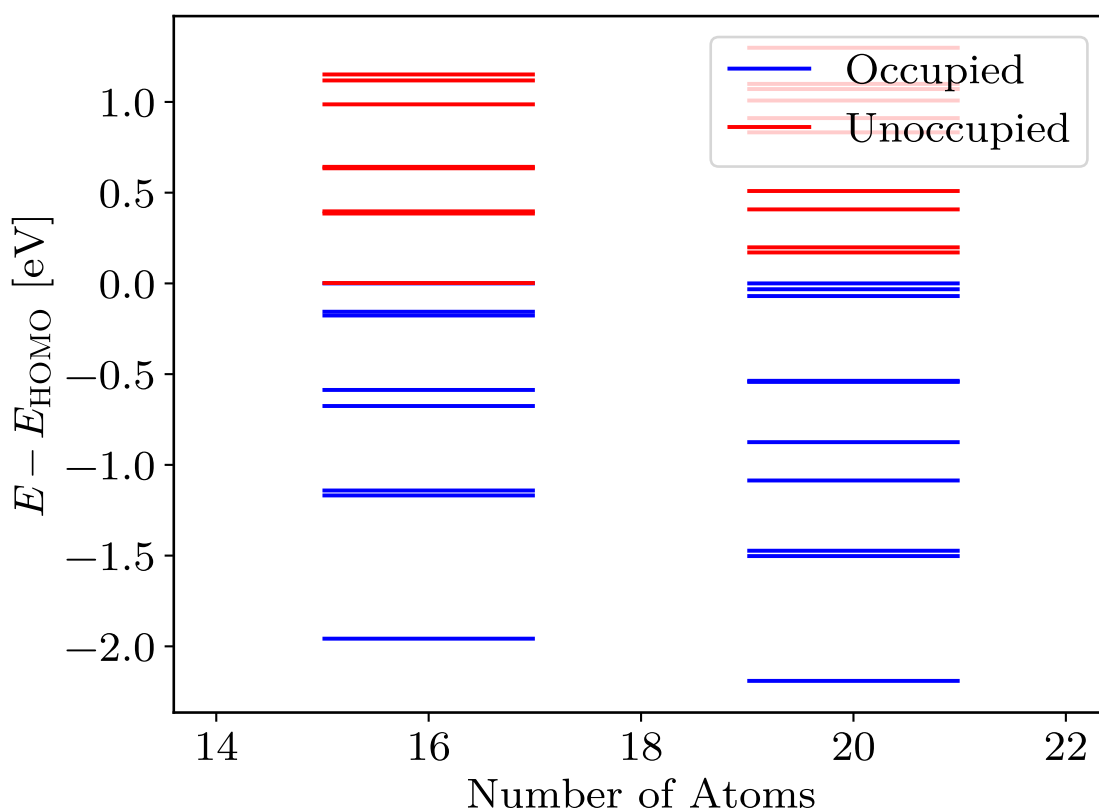

Figure 1: Positions of energy levels for pyramidal clusters (see Fig. 6 in main text) in DFT. Notice that levels tend to form near-degenerate pairs, or cluster in groups. This greatly increases the error in statistical treatment of the spectral gaps.

<sup>\*</sup>stepan.marek@matfyz.cuni.cz

<sup>†</sup>korytar@karlov.mff.cuni.cz

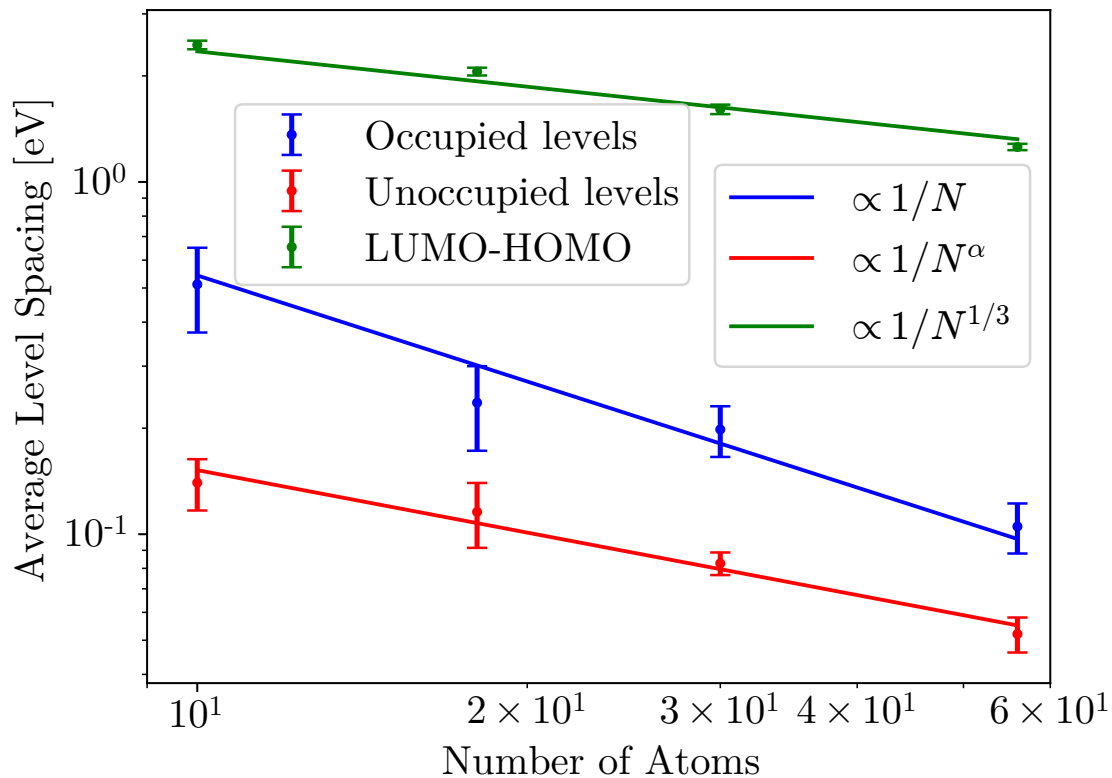

Figure 2: The average LUMO-HOMO gap and energy level spacings in  $G0W0$  method. This method is less computationally demanding, and hence even results for larger clusters than in  $evGW$  are present. The dependency of gap and orbital spacings remains the same as in the  $evGW$  case, although the values of the gap itself are smaller.

## 2 Electronic Structure Indicators in $G0W0$

While  $evGW$  provides advantages such as reduced starting functional dependence, it is known to have more pronounced errors due to missing vertex corrections, which is a deficiency of the entire  $GW$  scheme<sup>1</sup>. The missing consistency in single shot  $G0W0$  in at least some cases causes underestimation of the gap, which leads to more accurate results.

We calculated the gaps and level spacings in  $G0W0$  as well and investigated the behaviour in the same way as in main text, as presented in Fig. 2. It is clear that the  $N^{-1/3}$  behaviour is also present in the  $G0W0$  formalism.

## 3 Basis Convergence

In order to make predictions based on the electronic structure calculations, convergence with respect to basis size has to be achieved. In figures below, we present some of the calculations done in main text in larger basis set  $def2-TZVP$ . In all cases, the results in this larger basis are compatible with results from smaller basis. In some cases, specific values are different, but overall trends such as scaling with number of atoms remain same as in the smaller basis. Therefore, it is deemed sufficient to address results from  $def2-SVP$  only in main text.

The convergence of DFT calculations with respect to basis set size is displayed in Fig. 3. Same convergence but for HF calculations is presented in Fig. 4. For  $evGW$ , the basis set size convergence is presented in Fig. 5

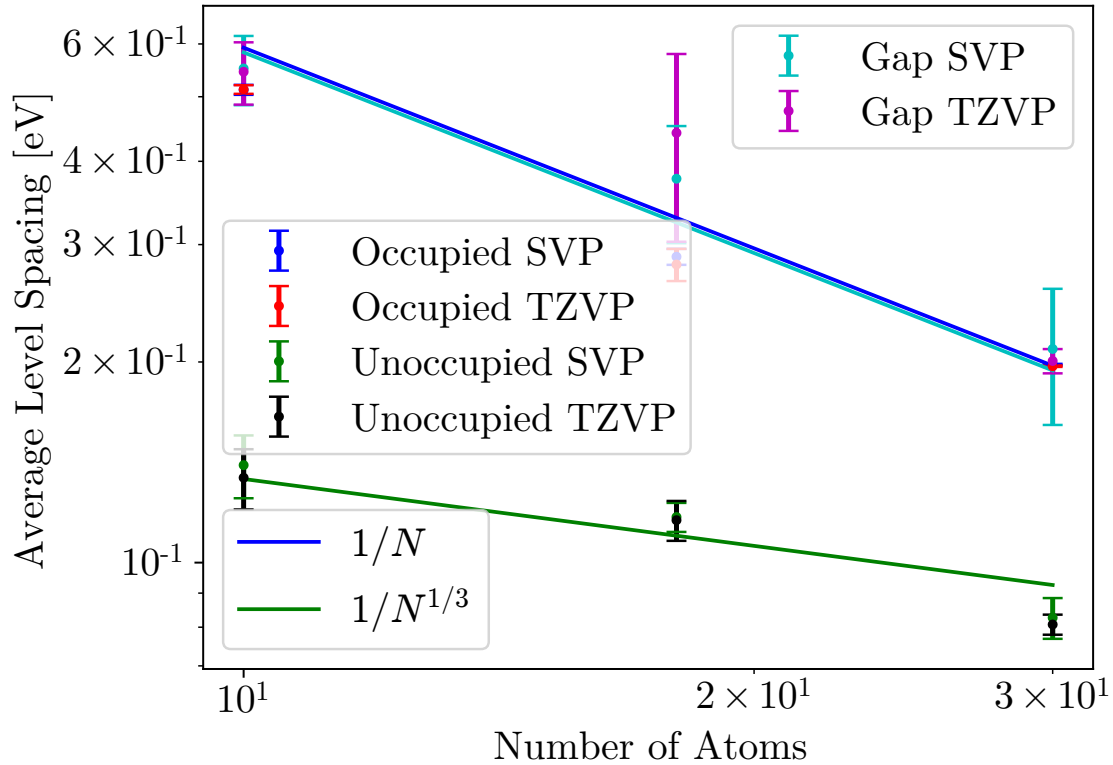

Figure 3: Gap and average energy level convergence of DFT calculations with respect to basis size. For unoccupied levels and gap, the results are compatible. For occupied levels, values of energy spacing are slightly lower, but the trend that can be deduced from the increase of cluster size remains unaffected by the basis size.

## 4 Functional Dependence

It is reasonable to investigate whether the observed variables are not a peculiarity of the DFT functional used in the calculations. To verify the robustness of the observed trends with respect to functional change, some of the DFT and *evGW* calculations were repeated with PWLDA functional<sup>2</sup>. The DFT properties are shown in Fig. 6, the *evGW* properties in Fig. 7. Other parameters of the calculations are same as in the main text.

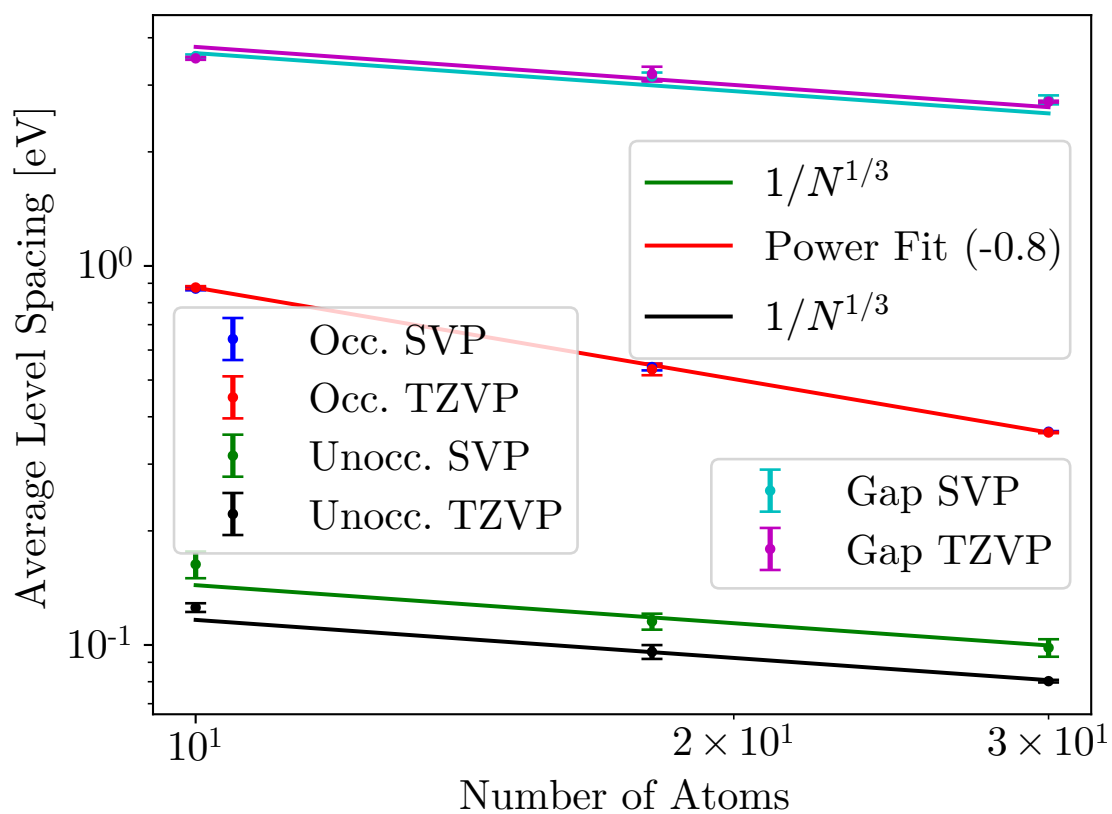

Figure 4: Gap and energy level convergence of HF calculations with respect to basis size. Gap and occupied levels trends that can be deduced from the number of atoms remain unaffected by the increase of the basis set size - unoccupied level spacing is decreased in larger basis, but the scaling remains consistent.

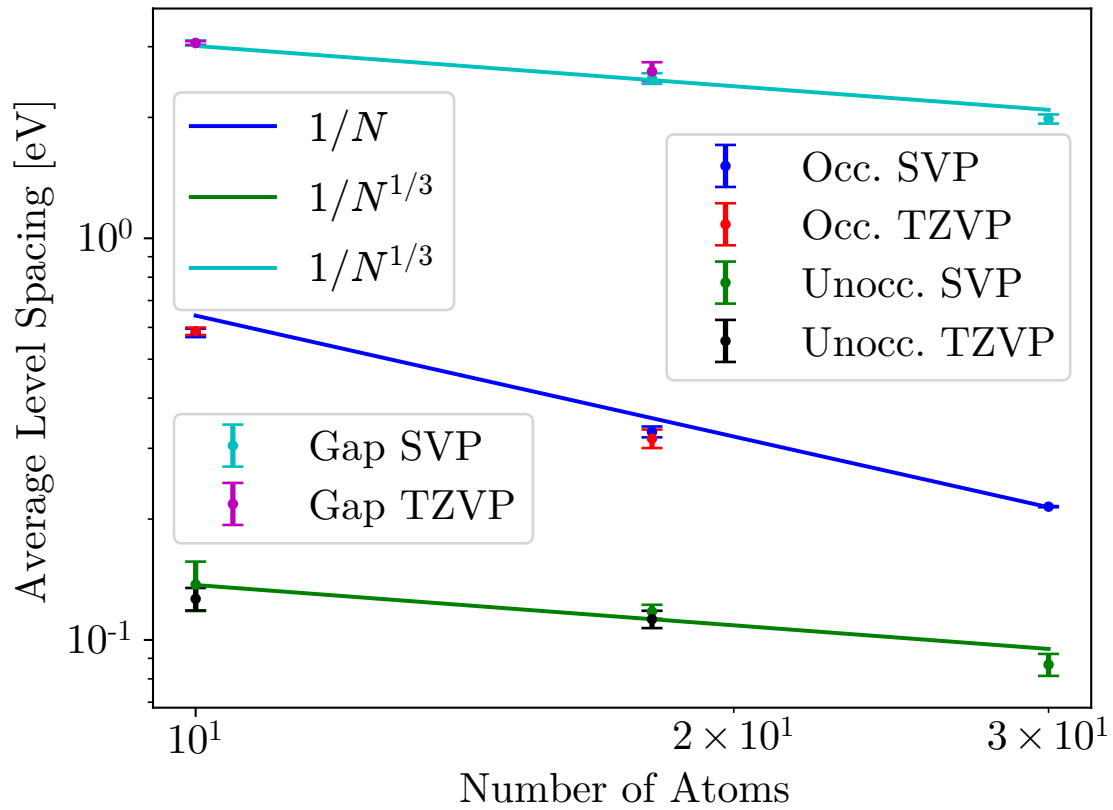

Figure 5: Gap and energy level convergence of *evGW* calculations with respect to basis size. Already for 30 atoms, the cost of full *evGW* calculation with larger (TZVP) basis is prohibitively expensive in our current approach. Within the few points for smaller cluster realisations, trends are fully consistent across the different basis set sizes.

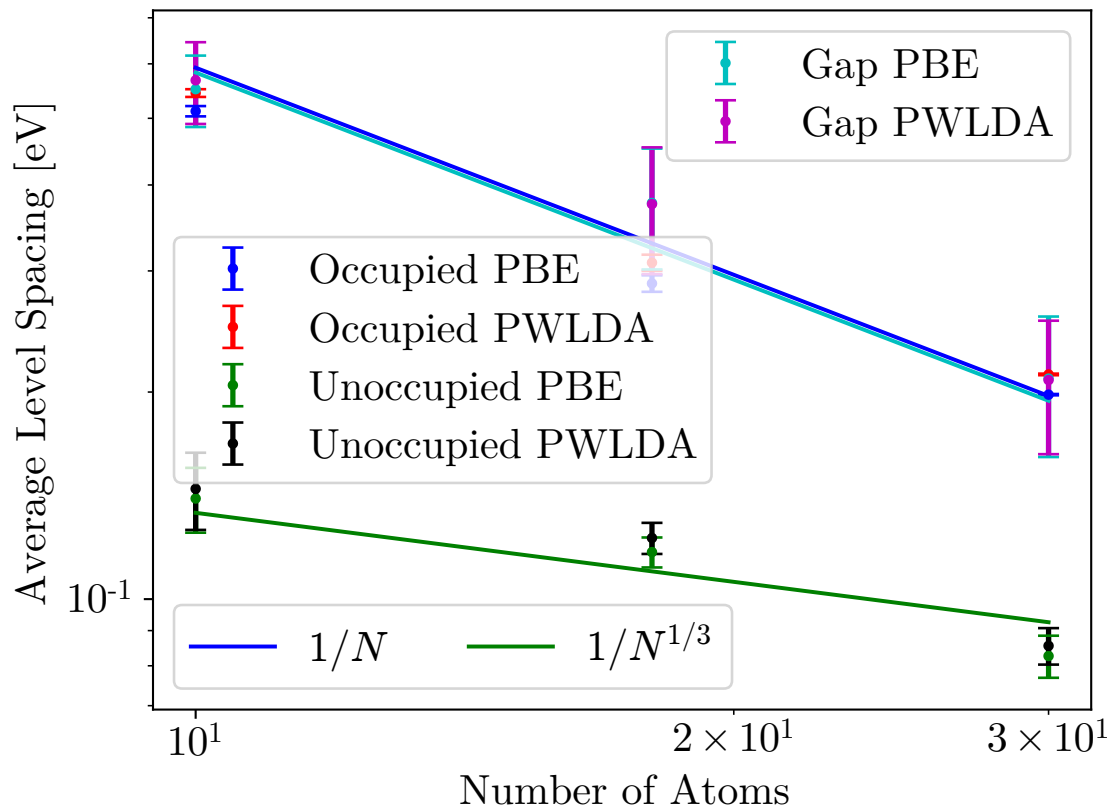

Figure 6: Gap and average energetic spacings in DFT for different functionals used. While there are small numerical differences, overall trends are robust under functional exchange.

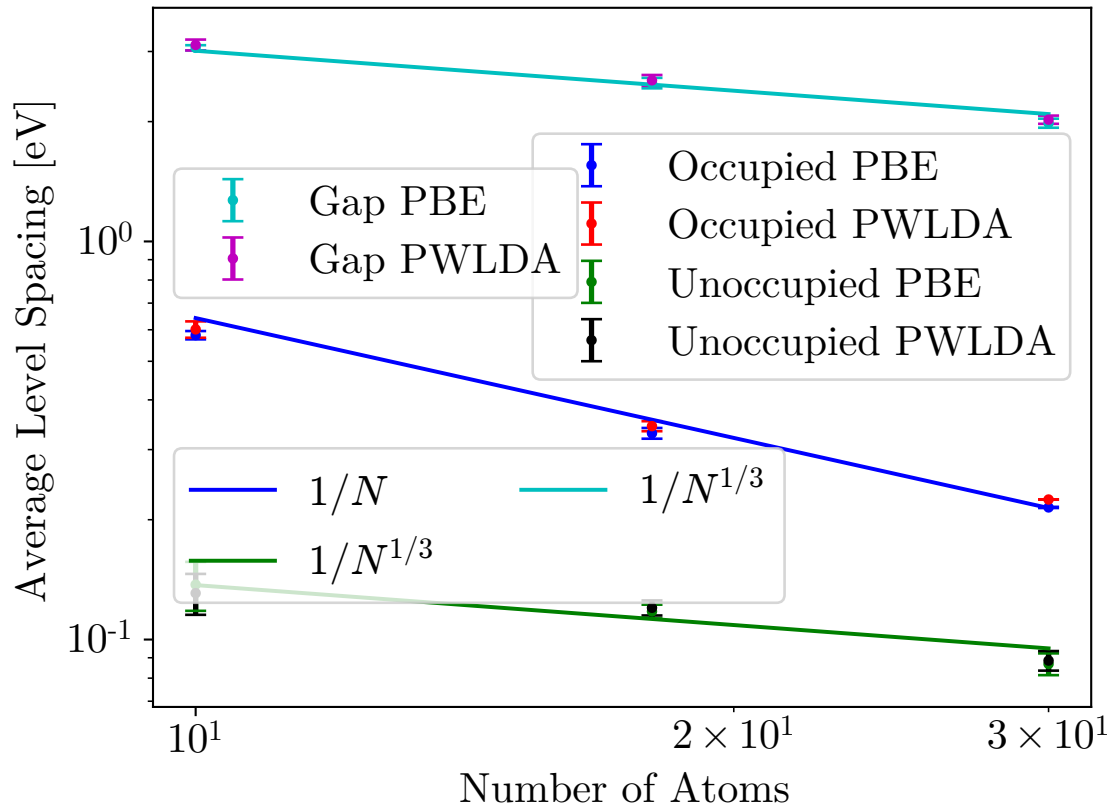

Figure 7: Gap and average spacing values in *evGW* for different functionals used in the initial DFT calculation. The differences between results for different functionals are even smaller than in the pure DFT case, thanks to the partial self-consistency achieved in *evGW* (restricted to eigenvalues, not orbitals).

## 5 Energy of a Homogeneously Charged Sphere

To gain insight into the scaling of charging energies of metallic clusters, we turn to simple electrostatic models. Assuming a uniform charge distribution  $\rho(\vec{r}) = \frac{-e}{V}$  on a sphere of volume  $V$  (and radius  $R$ ), the electrostatic energy of repulsion is given as

$$U = \int d^3r_1 \int d^3r_2 \frac{e^2}{4\pi\epsilon_0 V^2 |\vec{r}_1 - \vec{r}_2|} = \frac{e^2}{4\pi\epsilon_0 V^2} \int d^3r_1 \int d^3r_2 \frac{1}{|\vec{r}_1 - \vec{r}_2|}. \quad (1)$$

Using spherical coordinates  $(r_2, \theta_2, \phi_2)$  with axis along  $\vec{r}_1$  for the inner integration, we have

$$\int d^3r_2 \frac{1}{|\vec{r}_1 - \vec{r}_2|} = \int_0^R r_2^2 dr_2 \int_{-1}^1 d(\cos \theta_2) \int d\phi_2 \frac{1}{\sqrt{r_1^2 + r_2^2 - 2r_1 r_2 \cos \theta_2}}. \quad (2)$$

Integrating with respect to  $\cos \theta_2$  and  $\phi_2$  leads to

$$\int_0^R r_2^2 dr_2 2\pi \left[ \frac{1}{r_1 r_2} \sqrt{r_1^2 + r_2^2 - 2r_1 r_2 z} \right]_1^{-1} = 2\pi \int_0^R \frac{r_2}{r_1} dr_2 (r_1 + r_2 - |r_1 - r_2|). \quad (3)$$

Substituting into the outer integral and integrating the angular coordinates as well leads to

$$U = \frac{2e^2\pi}{\epsilon_0 V^2} \int_0^R \int_0^R r_1 dr_1 r_2 dr_2 (r_1 + r_2 - |r_1 - r_2|). \quad (4)$$

We split the inner integral into two parts

$$U = \frac{2e^2\pi}{\epsilon_0 V^2} \int_0^R r_1 dr_1 \left( \int_0^{r_1} dr_2 r_2 (r_1 + r_2 - r_1 + r_2) + \int_{r_1}^R dr_2 r_2 (r_1 + r_2 - r_2 + r_1) \right) \quad (5)$$

Integrating by  $r_2$  leads to

$$U = \frac{2e^2\pi}{\epsilon_0 V^2} \int_0^R r_1 dr_1 \left( \frac{2}{3} r_1^3 + r_1 (R^2 - r_1^2) \right) = \frac{2e^2\pi}{\epsilon_0 V^2} \left( \frac{2}{15} + \frac{1}{3} - \frac{1}{5} \right) R^5. \quad (6)$$

Hence,

$$U = \frac{2e^2}{\epsilon_0 V^2} \left( \frac{R^2}{5} \right) \left( \frac{4}{3} \pi R^3 \right) \propto \frac{1}{V^{2/3}} \propto \frac{1}{N^{2/3}} \quad (7)$$

## 6 Energy of a Screened Charge on a Sphere

We can similarly integrate the uniformly distributed charge with the shielded Yukawa potential instead of the bare Coulomb potential. We have

$$U = \frac{e^2}{4\pi\epsilon_0 V^2} \int d^3r_1 \int d^3r_2 \frac{e^{-|\vec{r}_1 - \vec{r}_2|/L_S}}{|\vec{r}_1 - \vec{r}_2|} \quad (8)$$

Again, we define spherical polar coordinates with  $z$ -axis pointing along the direction of  $\vec{r}_1$ , then

$$U = \frac{e^2}{2\epsilon_0 V^2} \int d^3r_1 \int_0^R r_2^2 dr_2 \int_{-1}^1 dz \frac{e^{-\sqrt{r_1^2 + r_2^2 - 2r_1 r_2 z}/L_S}}{\sqrt{r_1^2 + r_2^2 - 2r_1 r_2 z}} \quad (9)$$

The internal integral can be exactly evaluated

$$\int_{-1}^1 dz \frac{e^{-\sqrt{r_1^2 + r_2^2 - 2r_1 r_2 z}/L_S}}{\sqrt{r_1^2 + r_2^2 - 2r_1 r_2 z}} = \left[ \frac{L_S}{r_1 r_2} e^{-\sqrt{r_1^2 + r_2^2 - 2r_1 r_2 z}/L_S} \right]_{-1}^1 = \quad (10)$$

$$= \frac{L_S}{r_1 r_2} \left( e^{-|r_1 - r_2|/L_S} - e^{-(r_1 + r_2)/L_S} \right) \quad (11)$$



Carrying out the integration with respect to angular directions in the outer integral leads to

$$U = \frac{2\pi e^2 L_S}{\epsilon_0 V^2} \int_0^R r_1 dr_1 \int_0^R r_2 dr_2 \left( e^{-|r_1 - r_2|/L_S} - e^{-(r_1 + r_2)/L_S} \right) \quad (12)$$

For the first term, we again split the integration range so that we account for the change of sign in absolute value. The second term can be integrated directly

$$\int_0^R r_1 e^{-r_1/L_S} dr_1 \int_0^R r_2 e^{-r_2/L_S} dr_2 = L_S^4 \left( 1 - \left( \frac{R}{L_S} + 1 \right) e^{-R/L_S} \right)^2 \quad (13)$$

The first term is split as

$$\int_0^R r_1 dr_1 \left[ \int_0^{r_1} dr_2 r_2 e^{-r_1/L_S} e^{r_2/L_S} + \int_{r_1}^R dr_2 r_2 e^{r_1/L_S} e^{-r_2/L_S} \right] \quad (14)$$

These can be again integrated

$$\int_0^{r_1} dr_2 r_2 e^{r_2/L_S} = L_S^2 \left( \left( \frac{r_1}{L_S} - 1 \right) e^{r_1/L_S} + 1 \right) \quad (15)$$

$$\int_{r_1}^R dr_2 r_2 e^{-r_2/L_S} = L_S^2 \left( \left( \frac{r_1}{L_S} + 1 \right) e^{-r_1/L_S} - \left( \frac{R}{L_S} + 1 \right) e^{-R/L_S} \right) \quad (16)$$

Hence, we have six separate terms as follows (marked as  $I_n$ )

$$I_1 = \int_0^R dr_1 r_1 e^{-r_1/L_S} L_S r_1 e^{r_1/L_S} = L_S \int_0^R dr_1 r_1^2 = \frac{1}{3} L_S^4 \frac{R^3}{L_S^3} \quad (17)$$

$$I_2 = \int_0^R dr_1 r_1 e^{-r_1/L_S} (-L_S^2) e^{r_1/L_S} = -\frac{1}{2} L_S^4 \frac{R^2}{L_S^2} \quad (18)$$

$$I_3 = \int_0^R dr_1 r_1 e^{-r_1/L_S} L_S^2 = L_S^4 \left( 1 - \left( \frac{R}{L_S} + 1 \right) e^{-R/L_S} \right) \quad (19)$$

$$I_4 = \int_0^R dr_1 r_1 e^{r_1/L_S} L_S r_1 e^{-r_1/L_S} = \frac{1}{3} L_S^4 \frac{R^3}{L_S^3} \quad (20)$$

$$I_5 = \int_0^R dr_1 r_1 e^{r_1/L_S} L_S^2 e^{-r_1/L_S} = \frac{1}{2} L_S^4 \frac{R^2}{L_S^2} \quad (21)$$

$$I_6 = \int_0^R dr_1 r_1 e^{r_1/L_S} (-L_S^2) \left( \frac{R}{L_S} + 1 \right) e^{-R/L_S} = \quad (22)$$

$$= -L_S^4 \left( \frac{R}{L_S} + 1 \right) e^{-R/L_S} \left( \left( \frac{R}{L_S} - 1 \right) e^{R/L_S} + 1 \right) = \quad (23)$$

$$= -L_S^4 \left( \left( \frac{R^2}{L_S^2} - 1 \right) + \left( \frac{R}{L_S} + 1 \right) e^{-R/L_S} \right) \quad (24)$$

Summing together all the terms, we obtain

$$U = \frac{2\pi e^2}{\epsilon_0 V^2} L_S^5 \left[ 1 - \frac{R^2}{L_S^2} + \frac{2}{3} \frac{R^3}{L_S^3} - \left( \frac{R}{L_S} + 1 \right)^2 e^{-2R/L_S} \right] \quad (25)$$

It can be checked (by Taylor expansion of the exponential) that for  $R/L_S \rightarrow 0$  (no screening) we recover expression (7). On the other hand, in the case of large cluster, we expect  $R/L_S \gg 1$ . In that case, the cubic term dominates the expression and we have

$$U \approx \frac{e^2}{\epsilon_0 V^2} L_S^2 \left( \frac{4}{3} \pi R^3 \right) \propto \frac{1}{V} \quad (26)$$

## 7 Coordinate Files

Ensembles of different clusters were used to get average gaps and energy spacings. The coordinate files of chosen clusters (those without random degeneracies) in the XYZ format are presented below, ordered by number of atoms. These were generated by

1. Taking a subset of sodium bulk (BCC) crystal that fits within a sphere of certain radius
2. Introducing additional atoms at lattice sites neighbouring the sites chosen in first step
3. Relaxing the resulting structure in DFT, using PBE functional, def2-SVP/TZVP basis and converging the energy change between relaxation iterations to less than  $10^{-6}$  a.u.

10

```
NA 0.055212714725220956 0.05520459767390854 0.05498156142999597
NA 2.1535845435688707 2.1535843061224575 2.15353383765033
NA 1.9304317277492022 -1.6038924591913943 1.9304904360007125
NA 1.9304475764081164 1.930477209439644 -1.604285469613779
NA 1.5838516548269312 -1.8682754090803417 -1.8681197120124462
NA -1.6038703292014318 1.9304223491653698 1.9304522806140243
NA -1.8681309983106893 -1.8681077542813733 1.5839065904660894
NA -1.8682631482195864 1.583843445192425 -1.868085054898007
NA -2.0248247778577437 -2.0248230821377615 -2.024766480303482
NA 4.002160861469879 4.002166622255704 4.002491835824978
```

10

```
NA 0.09676026632084084 -0.06487470062293182 1.582074104143038
NA 2.7767366211117483 1.850079354681163 1.556842105471647
NA 0.7087953376195624 -3.6195982345965563 1.0504506219744831
NA 0.9599452923193461 1.8577601973429398 -1.682574229817503
NA 2.7340857753986736 -1.1757901612387858 -0.6044480511818571
NA -0.4066863136463672 3.522535548385287 1.3215500698684595
NA -2.588037897837477 -1.7724420144012247 0.9158720821971948
NA -2.319471688632291 1.436858868549804 -0.8511477569418768
NA -0.40986139825451817 -1.3412414732046118 -1.8581328723245483
NA -1.2343944293840818 4.965578739131205 -1.6656206958605522
```

18

```
NA 0.23169068285206437 0.5677288663514567 -0.497899001839623
NA 1.408765033785603 3.1495273714784764 2.1253853661072353
NA 1.7586371024640486 -2.953704938754019 1.4372336299142159
NA 3.0139451002522324 3.3409339487306062 -1.0235292043226292
NA 1.9410067554595258 -2.5878944670685424 -1.9843970213186477
NA -2.1013121622052897 2.7064081097826325 1.7552180078692698
NA -1.6992378587179426 -2.4298669154433785 1.733916659808687
NA -2.5130692177841354 1.8335308119007943 -2.0823188285869603
NA -2.209784771472103 -1.9491780144681816 -1.7861200669845898
NA 3.4277034478254347 0.07901390254283507 0.5709313149901124
NA 0.5933683671793478 -0.0500438997145832 3.154024245293566
NA -0.45197520240182026 4.4352069594480605 -0.7477818336088422
NA -0.45234048901077095 -4.749645899052954 -0.7640061757983548
NA -0.07360017184865525 -0.5986175297151118 -4.13976205183383
NA -3.958883920478557 0.025236318056112064 0.6207200047955954
NA 0.6026613361218224 2.857409286070958 -3.691342319691855
NA -2.7579460242312126 0.16922115118156478 4.0152983252267385
NA 3.2403719922036602 0.4453347592047908 -2.986170870559264
```

18

NA 1.1898968124934743 -0.7397182321824357 0.02060148336269611  
NA 3.655830142882091 1.6005495968064278 2.3251062742226387  
NA 1.985383069131888 -1.4989437100025007 3.420342445683209  
NA 3.2580757531651785 1.5977539104174723 -1.243515262891283  
NA 2.7158453800902813 -1.758665278980458 -2.7091424273653684  
NA -0.8831632217379998 0.34298888597277905 2.058945105219646  
NA -1.42125437111116 -3.020733209770394 1.6082782739405137  
NA -2.7093844839316925 2.0921120926027683 -0.21798142905656506  
NA -3.164219906574211 -1.2378895344029999 -1.0596949483221647  
NA 4.556088099672349 -1.4131070241764778 0.7212876675704674  
NA -1.425968338013822 -0.8800923110426367 4.980260686875249  
NA 0.7504727248357532 3.0825010905604393 0.9809832663683703  
NA -0.5550531387398994 -3.3181719764461577 -1.9610039724300028  
NA -0.40525220257507816 0.49843589967729823 -2.5943621244615156  
NA -4.111598200918195 -0.4570542137391805 2.3200967204614207  
NA 1.0629503232790982 1.7965235347059048 4.677759771970648  
NA -2.221135406907202 2.967267150859683 3.377573180499507  
NA 2.013086788373658 -3.9443569711172435 0.456865058855051

30

NA -0.9101930267725337 1.4034682857686795 1.0513103878961199  
NA 2.570466719752443 2.3199143233962918 1.8424796923147002  
NA 1.342360416728102 -1.0947233752075518 1.1621357416088196  
NA 1.6079701992948423 1.214797446405242 -1.506862922661898  
NA 2.258658090686134 -2.199436292412989 -2.261679577549841  
NA -3.5054104592885276 1.1084675502538135 3.598234968301778  
NA -2.0109048768503426 -1.9522627212597565 2.202597873020186  
NA -1.7453654832178487 2.223152357588262 -2.387282827126302  
NA -1.1738403791815049 -1.173466846578446 -1.2975399035965267  
NA 4.036872673396288 -0.5414360604176446 3.3463830533542875  
NA 4.283073821112848 3.424716213049947 -1.2948476186370979  
NA 4.658763225449369 -0.14627518120013847 -0.3555331484863136  
NA -0.6781083546951484 3.674178963007842 3.6100363360620062  
NA 0.2456158734240692 0.29245954198150115 4.3332963634589055  
NA 0.5372647109539858 4.362480348686803 -0.3347553804675984  
NA 3.469360310595768 -3.570583615847074 1.1329489569828077  
NA 0.7366120446569591 -3.1802728109205685 3.954978086411866  
NA -0.22183051317595853 -4.186441473587455 0.14804179055632288  
NA 4.029185714020867 0.6072508054863036 -3.8582734315388905  
NA 1.6349538123362444 3.4208265931748416 -3.9751191569746216  
NA 0.3633726798837873 -0.06801019350949145 -4.577160273507945  
NA -0.9864054833138068 -3.3586506382359014 -3.8979750997632676  
NA -5.244654596398908 -2.047426369944781 2.9701703198920035  
NA -3.0494200404901286 3.8548010128341277 0.706385683709469  
NA -4.189312981582808 0.18260179858362546 0.1788058838106048  
NA -3.915886544249475 -3.409162885588016 -0.3380630570240295  
NA -3.8640342714644094 -1.1514033552265726 -3.335972056962461  
NA -2.4173794526291874 -1.7929015377668007 5.636559368766809  
NA -1.8518137241155217 1.8242904685952592 6.6491079758876666  
NA 6.13533028242688 2.10434755935239 1.9146922991575326

30

NA -0.6937306383905046 -1.7248854014993487 0.6037816608027224

NA 1.4215609251022978 0.8954574663688089 0.7848523821378535  
NA 0.6269138207905761 -0.7677422052409696 3.6788179707769997  
NA 2.035918681127442 2.300293922365585 -2.4909990567153986  
NA 1.6473329184508687 -1.277916906086264 -2.058310316601365  
NA -2.031545322610103 1.488529593710624 2.114831285485251  
NA -2.708433987494197 -1.895375741521426 3.578626551963353  
NA -1.2049771265135831 1.0104267522884733 -1.589832046348924  
NA -1.800124822187951 -2.29615513973278 -2.9031239170161682  
NA 3.9892272390720627 0.4001461486905975 3.2539619003546765  
NA 3.4219621760465317 3.429547547044728 1.0374088055261337  
NA 4.606105922836354 0.09881601199072161 -0.5075949828374189  
NA 0.8802891629186375 2.813766896721786 3.8100634722407247  
NA 2.119891777302696 0.34602190613816153 6.440503296092252  
NA -0.2632486410843188 3.972518262807895 0.07906166495202961  
NA 2.837155782616737 -2.6371350957283264 1.2022812563603256  
NA 0.2956751636658198 -4.312880607150282 2.9330701476419825  
NA 0.6194160801953479 -4.50606677123866 -1.0876254599088595  
NA 3.569661188311176 -0.18159490785512541 -4.5846993750799525  
NA -1.3803568977569702 3.675136609402373 -3.6183973033760073  
NA -0.08536193073410835 0.3327734629875817 -4.900116048429663  
NA 1.1685276395184079 -3.160133300398393 -4.824732515115289  
NA -1.5212522075587054 0.9384634591920461 5.799780485652798  
NA -3.8486447765727045 3.0854547868703457 -1.0347568526630793  
NA -4.017061882427409 -0.6375818993708054 -0.3700310545760257  
NA -2.81825851158567 -4.168098650402003 0.4860139928176158  
NA -3.7192563080189074 0.7092547654864084 -3.852980769632494  
NA 3.2226005728765346 -2.9389702159566697 4.773859710805814  
NA 5.988520729687675 -2.3951957704374616 2.401052345677856  
NA -0.2472457178880811 -2.5839076090393283 6.318017694734744

56

NA -0.07466477098799267 -0.3555584136497243 -0.3078579702012267  
NA 3.7863712149247672 3.3973492186662866 3.086424340902014  
NA 2.3178743330504132 -2.178498446818546 2.116532194275506  
NA 2.454860285336999 2.224481917440898 -2.7090351193454723  
NA 2.663422017555286 -2.163547370549568 -1.7487289297123816  
NA -1.899537259416183 2.1614113883662505 2.051477964995475  
NA -1.6253617808522378 -1.57295533702242 2.6441138064686207  
NA -1.7364300630939067 2.469762308818485 -1.733010916103763  
NA -3.1145257920598404 -3.2391159006197014 -0.4989260297624784  
NA 4.304518467356215 -0.16420582854022864 4.320566440972235  
NA 4.2612379604129 4.315603852763864 -0.5361910085881565  
NA 3.7256426431746594 0.6244329881642618 0.35930740990566745  
NA 0.2349180836976275 4.374906587274794 4.026689160014586  
NA 1.17701091886503 0.9316696640882756 3.1480902269809596  
NA 1.1318181502750089 3.185001436020816 0.4780399378637562  
NA 4.22318606408207 -4.710028705551082 0.27349404591492305  
NA 0.047321789231605835 -4.466122473661661 4.243501577594418  
NA 0.1552602762228749 -4.041392202791153 0.4904743290304568  
NA 4.376072160866706 -0.676781340408474 -4.350549205422974  
NA -0.23085605531673706 3.6484077843403115 -4.859012336521091  
NA 0.196753053327646 0.028363476473779743 -3.9625834398633963  
NA -0.42255236590973816 -3.356215406661495 -2.9227568823821084  
NA -4.643574937311613 0.7107919011696414 3.7382360528217067  
NA -4.782003264915247 3.6317792310608765 0.7688062275638223

NA -3.8575522149537997 0.08462229855100203 0.1599902729749387  
NA -3.638617239604765 -4.594562771006916 -3.68720858480675  
NA -3.217294703496327 -0.8506809341561545 -3.419779618209667  
NA 6.712369682768443 1.4052420243910178 1.5126267818963555  
NA 2.004109316666592 2.1128310058390096 6.236992735371999  
NA 1.9028555707718415 6.30861870437559 1.480016990694356  
NA 6.015329218266835 -2.146328038645605 1.9862719395416477  
NA 1.065515727296879 -1.4853535273410128 5.636366584065417  
NA 6.0376010956151385 1.6029821314694075 -2.160547945947835  
NA 0.6657112275318938 5.5221348054702775 -1.9504918885595404  
NA 6.166000220003822 -1.936246200040136 -1.468117541711079  
NA -1.5641409821561303 1.1995851281657073 5.503556104308482  
NA -1.7009816576489507 5.55927479191752 0.9184195997848736  
NA -2.966560549451633 -2.4831195693490966 5.448746487824315  
NA -3.185285491940261 5.250260402635326 -2.5600287561694577  
NA 1.388727126743058 -6.725285811639135 1.8134873095608344  
NA 1.8815514648442522 -6.207462897990801 -1.847187470741223  
NA -2.6688427535973607 -5.269554760279273 2.2823972207960774  
NA -1.5429752230627585 -6.556952470681299 -1.147300591626024  
NA 2.3439177017914243 1.4628885366245368 -6.314133744408385  
NA 1.766956650489942 -2.4679358554462674 -5.921632508797835  
NA -3.487696388187018 2.385592597551881 -4.9514300887070934  
NA -1.1780565769794042 0.573705871293925 -6.940301672807327  
NA -7.029559641396883 0.658069587749272 1.0171455057371321  
NA -5.233646548880884 -2.4980057400577866 2.2853871183032357  
NA -5.643776673923381 1.9707657554093503 -2.2066117368551117  
NA -6.196305511456811 -1.847361625566365 -1.6433108878099074  
NA -1.7444304828988155 -2.8111898602028007 -6.192960782351972  
NA 0.1920270860645652 -5.800060392341887 -4.972892740242952  
NA 4.147157583150527 -4.342924128035829 -3.8230793428085934  
NA 3.7588942835925816 -4.2627665146023705 4.077139827220104  
NA -3.4291625062961515 4.247277375437452 4.150169671214905

56

NA -0.04631702793903175 0.007800721224214044 0.42253279648178876  
NA 2.41251044459122 1.6899570593324322 2.166099394299779  
NA 4.2513830787826326 -2.186498382653784 1.7475173940938258  
NA 1.5526865834897856 2.646594690125234 -1.5131129440851816  
NA 0.3923136082031863 -0.8300471268434193 -3.053034561757983  
NA -3.3934948716777344 3.642667515218992 3.5469508951200397  
NA -1.9800029370970549 -2.290113779234623 2.3413628280239487  
NA -3.849173993273838 3.6856413910293573 -4.083847231262957  
NA -2.704945803097685 -1.632423066926998 -1.222021674456211  
NA 4.683371119125068 -0.04997218429352618 4.782199428634031  
NA 4.640505390020643 3.9520781343369293 0.18099993797965594  
NA 3.2429476021499344 -0.4224167908033133 -0.8865092856470131  
NA 0.3542772057291641 4.318291922664388 4.115176659713588  
NA -0.9747222935926391 0.9885901964584154 3.692129230763429  
NA -0.900234258864863 3.3766651895826696 0.997903471858143  
NA 4.099149401036647 -4.333983292611878 -1.2198299413467635  
NA 1.4065759691122874 -1.7437607775620012 3.564893634254408  
NA 0.8562041513710179 -3.327743407972682 -0.01797505770378594  
NA 4.121001731918858 -1.669498927894642 -3.895057600137463  
NA -0.08400797818835165 3.991348270005931 -4.658468388170247  
NA -1.9441900589847398 1.8694221289822268 -2.1872930916409543

NA 1.3841420781612876 -4.209615577727917 -3.540036985879415  
 NA -4.301448456292411 -0.202823099329715 4.39543646018458  
 NA -4.217703285212538 4.2852182925902005 -0.19301310020617474  
 NA -3.4237127900197417 0.9988903293968614 1.125975579094052  
 NA -4.237237066531109 -4.692628785628791 0.9430841230296958  
 NA -4.273200616177235 -0.07288440457142727 -4.319675832280289  
 NA 5.99688784629385 1.069259088082935 1.550544338454674  
 NA 1.6868405888038702 1.4155434964928257 5.977350624901098  
 NA 1.657803486498669 5.6264048980058465 0.8550754394998719  
 NA 7.352204461223371 -1.9369882830294463 3.0278204430921596  
 NA 2.2038627591739894 -1.9465283288255375 6.965802324260358  
 NA 5.239713246127127 1.6883256438768246 -2.539736782446131  
 NA 2.9914715471140387 5.197154058723425 -2.9078410854834216  
 NA 6.6404146786933358 -1.6787393149348053 -0.8720092706697812  
 NA -1.8508264065728384 2.1948636602127904 6.696624053541799  
 NA -1.82908961033808 6.5110437585733045 1.7686348174963373  
 NA -1.2557377763913142 -1.5108864848012877 6.126993278210811  
 NA -1.0004958265166364 5.565461224730886 -1.7241371216901833  
 NA 2.6425105206913657 -5.486353713682202 2.291678091435326  
 NA 1.3218735196358384 -6.721665478109813 -0.8117440600490289  
 NA -0.9724562239061293 -5.80610697007674 2.0306836968380866  
 NA -1.8130125855432215 -4.966941346130481 -1.7329114252754256  
 NA 2.4521135298752164 1.5283823722857703 -4.768564738429935  
 NA 1.1587117691808777 -1.7390628653875435 -6.290869635902812  
 NA -1.2692521912409567 0.9028902449708042 -5.755011517493423  
 NA -2.125629189489754 -2.7990440585443648 -4.661976897530879  
 NA -6.495784838045215 1.9914103141114352 2.03445234645293  
 NA -5.720599164422394 -1.5375943336095454 1.1412948341207625  
 NA -5.801695189095127 1.082229247129328 -1.4820773787490065  
 NA -5.348939450797158 -3.0632217665280987 -2.37140479654959  
 NA -3.31803007201193 -4.284599704687062 4.562619832339524  
 NA 0.41299076743457913 -4.633398760675511 5.147282050151779  
 NA 6.192028036668362 -5.0140330307457015 1.5996684906876142  
 NA 4.448762738951968 -3.79555865343572 4.853363715543062  
 NA 4.24596385355247 3.621311561652677 4.035716852345117

## 7.1 Discarded Clusters

For reference, we also provide clusters which showed random degeneracies

10

NA -5.0857118366309434e-06 -0.07986484976492443 -0.07986509541443096  
 NA 1.6664916701589447 2.0846971357228368 2.0847274648685596  
 NA 1.8823439871553551 -1.7049595656484278 1.800583595683566  
 NA 1.8821867375115164 1.800850451493193 -1.704918794477301  
 NA 1.6838387063280202 -2.1252387242814867 -2.1249904176291867  
 NA -1.666495018441512 2.0846929006788613 2.084723980720733  
 NA -1.882329487697591 -1.7049274241561458 1.8005547044294377  
 NA -1.8821740773525348 1.8008253268255168 -1.704887314719179  
 NA -1.6838365988942294 -2.125220231366363 -2.1249710053106914  
 NA -2.0833056122244356e-05 4.259744803466419 4.25964270481793

10

NA 6.216918868244231e-08 0.2363778567131518 -6.447143234796901e-08  
 NA 2.0097482122286356 1.9636114193303496 2.008511933697167

NA 1.8327534270238768 -1.9252496980732887 1.8316331003995256  
NA 2.009768878016911 1.9638204647577966 -2.008527210239357  
NA 1.8330639152147916 -1.9250755714276484 -1.8319496151277794  
NA -2.0097688620232814 1.963820485713537 2.0085271966823344  
NA -1.8330639299650615 -1.925075431051492 1.831949619273084  
NA -2.009748170063944 1.9636114163497063 -2.0085119614111515  
NA -1.832753420297008 -1.9252496881163115 -1.831633097558114  
NA -1.1230395094528709e-07 3.900008611720055 9.875572844554781e-08

18

NA -0.2584760858336334 -0.3190897834180881 -0.30194889586022855  
NA 2.7523991648360315 1.1919735594876597 1.4717089108371866  
NA 1.4165446461930948 -1.8908310670039952 2.6955175601864756  
NA 1.784837885659362 1.4785685439365264 -2.0942859000793272  
NA 0.8844027539425904 -2.3412782286709595 -3.0371369800106653  
NA -3.149553823813277 3.4398151663178447 1.5677817178278204  
NA -1.8116754836256725 -2.881856473847662 1.3199957852107704  
NA -2.022118971178899 2.735028101860294 -1.8159873928769528  
NA -3.1513346733967778 -2.0237555449743385 -1.8877041122488558  
NA 3.391601293093637 -1.518758348033361 -0.6042501713880039  
NA -1.1057000866434261 0.7115746493628713 2.8434535859467704  
NA 0.30581772338937535 3.43525109332031 0.5784146067700524  
NA 1.2731934090325534 -4.2537207310154574 0.15610719087022198  
NA -1.0885176338693079 0.37144773805767056 -4.104148682943633  
NA -3.9050931234913167 0.2947795637685409 0.43384757130529095  
NA -4.557029421124517 0.7454006527552721 -3.2335430671768526  
NA -2.1029433301702296 -2.817960779846241 -5.030723662703788  
NA -1.5281541527789435 -4.937788210810483 -1.8288979733638164

18

NA -0.11051763589892107 0.23481062508262837 -0.11633129810719775  
NA 1.4802900087037842 2.5833195759914656 2.069740773687382  
NA 1.78068212849794 -1.2677145397018452 2.4692955873846714  
NA 1.8932092099853968 2.1453859315270605 -1.8255275609491175  
NA 3.011950808156601 -1.4730277881582183 -1.61486126786123  
NA -2.2364218221665935 1.9661765708406935 2.763836347378597  
NA -1.8336976848994477 -1.5135393798032195 2.18590800423666  
NA -1.6972976764113632 1.7321358629612515 -3.0032611141929735  
NA -1.8577942257881956 -2.1751775649569995 -1.7290771083811323  
NA 4.2469088036184495 0.76197024950713 0.668125540404212  
NA 0.1012882967195075 0.35533868726357287 4.841588404908736  
NA -1.1654645878286207 3.700845345011519 -0.14990829450231055  
NA 0.7818381704753155 -3.641646203029914 0.3233827075777076  
NA 0.7311855101971728 -0.5426574271613239 -3.9690077318018613  
NA -3.677048162422653 0.6441219527478194 -0.14126291934238608  
NA 0.9750105434628935 -4.038655821684312 -3.106913702681678  
NA 4.395312968740767 -2.936893065710071 1.2352478999981633  
NA 3.8321121381672385 0.8083913837899098 4.15755251963921

30

NA -0.8267346401441471 1.5799539891225487 0.9592612358557429  
NA 2.813688107075969 2.010613637344497 1.6228608550075334  
NA 1.191559961444364 -1.2149203913377233 1.2427932711452407  
NA 1.5533502680243783 0.9062787684837222 -1.5790212678048503

NA 1.7660943963096163 -2.741062846937361 -1.9679548408756253  
NA -3.443280710014282 1.649302679783039 3.292376085404188  
NA -2.202246913359515 -1.4731916617623213 2.3311312307625682  
NA -1.7511512871847623 2.0982164463339124 -2.4598060436995826  
NA -1.4056658099865407 -1.2739774659745735 -1.1861287428587222  
NA 3.7838012750116374 -0.6277126603767829 3.6306390809463958  
NA 3.7573747848683845 5.175628636717299 1.8215288890235193  
NA 4.482502518138937 -0.5531898001339004 -0.2017656490885613  
NA 0.34419176639396193 4.221703134606575 3.0582712531813554  
NA 0.4255235197921146 0.73706562209606 4.1928522592566475  
NA 0.9984954975725632 4.321917486779207 -0.5882062971898345  
NA 3.1431462076720558 -3.835806776092421 1.3770915758554951  
NA 0.22543365188817188 -3.3642203103156874 3.89107221011781  
NA -0.7200399105204096 -4.3180599150801955 0.4456893846696702  
NA 4.053720333313232 0.27847308550784466 -3.7098955642264633  
NA 1.8105594752119043 3.2317578732386525 -3.9858586653410675  
NA -0.1881285058074134 -0.72256472460077 -4.37442581964113  
NA -1.6259750300500706 -4.015415533245114 -3.129773175609304  
NA -5.510235981458093 -1.5557154246419622 2.779525534415058  
NA -2.90106718380391 4.062530342255817 0.47857096190833237  
NA -4.227629230386332 0.5210785820557744 -0.0778621850237152  
NA -4.210154278030138 -3.227297726779758 -0.31035228994163533  
NA -3.873462554194093 -1.143824789715247 -3.436801342134519  
NA -3.2655658052728205 -4.568426997628913 3.148020819697671  
NA 3.5073671199345626 2.906381873429185 4.767588900659668  
NA 4.439828875607869 3.0797847849163844 -1.304921120559478

30

NA 0.9441855658139204 -0.4255176166967906 1.3944549925595207  
NA 1.894652867731553 3.049744669188698 1.6315170492959037  
NA 3.577692143155511 -2.797963581556053 1.2585487906782824  
NA 1.1744115097774126 1.560049134639527 -1.5532544485868258  
NA 1.9902503049490365 -1.9524224083684056 -1.673943005326499  
NA -1.5594559658559544 2.0451497592484658 0.8791688111063825  
NA -2.4648383236860454 -1.042213033959319 2.4840304544396394  
NA -2.204977429170451 2.1956289911826246 -2.683599961708511  
NA -1.419435606873877 -0.9085110099490379 -1.0803340235838634  
NA 3.129366316799818 0.15907798577215612 3.7466800691744258  
NA 3.6207222320812824 3.8705970610127607 -1.66123881810905  
NA 4.226772995127082 0.5750780964676092 -0.09407545972326324  
NA -0.5409690310150296 1.396067351546611 4.2135329994321475  
NA 0.15736774495463024 -2.4287935115156474 4.2514375139491944  
NA -0.02631770030999009 4.7658498804897205 -1.036568209998454  
NA 5.310406105563451 -2.3966885900185577 -2.0648790756069477  
NA -3.069720593257449 -4.131562572632144 3.606895111671956  
NA -0.4342574738256911 -3.721180070371058 0.8677864927799903  
NA 3.72199588281402 0.6130850687228525 -3.801041958110408  
NA 1.212093213236104 3.3681873346194102 -4.366030996381451  
NA 0.12117957221188812 -0.2415745307285755 -4.3859244667809705  
NA -0.6738760377636916 -3.5929380513854645 -3.209462159254107  
NA -4.20290528488963 1.886155467222625 3.345050626464852  
NA -4.170072031568926 4.067709950197253 0.28927717946247694  
NA -4.640859297280804 0.4484315562282955 -0.058594054000934995  
NA -3.952832780947407 -3.194171321616382 0.0035320564647386673  
NA -3.508644570983443 -1.1757072708127188 -3.5809166657442044



NA 2.7595929131058567 -2.870021316487487 -4.7929212405140955  
NA -5.699584537204307 -1.5949138927665163 2.904995113260254  
NA -1.7078429160153383 4.618666861317993 3.0205768936813424

30

NA 0.7805273899261653 -1.636982866937635 -1.0132708025991684  
NA 1.1812016674639192 1.0961811601438298 1.225385015318818  
NA 1.6169238563653086 -2.350422278920226 2.4287578751158208  
NA 2.2042488356070407 1.4930882880145333 -2.1959941047795573  
NA 3.2353905687496116 -1.4817009989069907 -3.6161436980156947  
NA -2.131372775055985 2.328930490429625 2.0209692312739165  
NA -1.666899839160896 -1.2232156327788737 1.532087163305266  
NA -1.3588217192055707 1.0638407026740402 -1.2388950571310229  
NA -2.6686361506175147 -2.2688716883834212 -1.7717454477316334  
NA 3.8112088465520513 1.0776826638524253 3.2981758292805448  
NA 3.9156942175890324 3.2758952014789164 0.30841152984033426  
NA 4.113226959155524 -0.5035678280127921 0.0412711633557931  
NA 1.4152370172224897 3.9151384090975885 3.0478265902195996  
NA -0.3039540136279794 0.10579378561186542 4.425048202566498  
NA 0.3854495517029044 4.1629677233527405 -0.4688787583547634  
NA 2.859453813603065 -4.127737834552121 -0.6791507181791162  
NA -1.635998611752388 -3.4434391316251225 4.0713071455167  
NA -0.9262571077671707 -4.544824452434894 0.6168632470888968  
NA 2.7087600212746112 1.6743995101864722 -5.497193873042884  
NA -0.44104540345600207 3.2000396219433123 -3.9551736058297724  
NA -0.23126204283744298 -0.44197150763787474 -4.266391756957295  
NA -0.2564133068368505 -4.379453993907473 -3.013260750611818  
NA -3.9983511026311085 -0.6588232775627216 3.860366130484344  
NA -3.520636882588411 3.511679750452683 -1.2295184060854916  
NA -4.639010758369431 0.1532590867186239 0.23194014679458322  
NA -4.421817623478845 -3.4211856432562042 1.3449947366955872  
NA -4.085868301469904 0.48142489263390137 -3.360762180203037  
NA 2.954241402468305 4.5678203851158035 -3.164766847216064  
NA -5.990591663494702 -2.5656750230561594 -1.9496497545401492  
NA -3.631127372734335 -5.4961697348147736 -1.7591082961519413

56

NA 0.03223428416305724 -0.013241298957691706 0.3527070050579702  
NA 2.6195169492529513 2.7885101165343804 2.1142903997354328  
NA 2.290589377392709 -2.4313850772092684 1.637455967905066  
NA 1.2326596790663504 2.6697717348046757 -1.496245883948109  
NA 2.018578251821407 -1.8461041299343826 -2.0404717515926363  
NA -2.552526812181983 0.8156685350929291 3.3865303208839697  
NA -1.2040003131309744 -2.5359758283345357 2.33193614937536  
NA -2.343000441165632 1.9538579502978835 -1.3374182850686904  
NA -1.9766675270280278 -1.9704336165950105 -1.920008187610146  
NA 4.164505033506737 -0.72597659786924 4.1048110730970935  
NA 4.56774804972748 3.8855988302441005 -0.7898516182188707  
NA 3.815122342911443 0.3940476524254457 0.014193835934147206  
NA 0.409802422951527 4.593057565008431 4.330188650400574  
NA 0.8258175265592497 0.30707039555392973 3.889177925584458  
NA -0.8062318503764645 3.2563445362674557 1.5478913215654238  
NA 3.805642465984167 -4.816311795295039 -0.16829893776521848  
NA 1.2840321947239435 -3.3376362462980462 4.996878897834981  
NA 0.05790095624132214 -4.491310943859165 -0.7599302201183615

NA 3.9735290581296283 1.4954577125890582 -3.4633929542846293  
NA -1.1949906106123451 3.683079567550265 -4.302479380944081  
NA -0.20482456604959698 0.1858279415494308 -3.987779757491179  
NA 0.011551710018737765 -3.615109907131131 -4.548627050323571  
NA -4.549725738836496 -2.2765850301907404 3.825877961800585  
NA -4.280967811857734 3.683635024888893 0.9862636035457303  
NA -3.893674913085921 -0.6207956334682944 0.6146048165828757  
NA -3.6759100227074306 -4.289513042868482 0.6616499367583326  
NA -4.143501722029907 0.7081050450592538 -3.8344812581620613  
NA 6.035793715113365 1.8749578923016026 2.3215580642551346  
NA 3.1294016149406283 2.434986555812586 5.620049728429722  
NA 1.6146204545346214 5.78972103609105 0.6050490837860261  
NA 6.053823621681851 -1.9797764009230232 1.090753724019237  
NA 1.7261143823281235 -0.5616376975167613 7.166045590596409  
NA 6.959970063019671 1.026258631792248 -1.1310968772527026  
NA 2.0827234714572604 5.209324475728743 -3.3210273148491436  
NA 5.464251521192588 -1.9426295449734758 -2.5358152338061832  
NA -0.8817946867968838 2.0158491395586493 6.516779469503203  
NA -1.9656263241973415 6.391967543202233 2.0726075283395637  
NA -1.7054493443453822 -1.6764555640467793 6.0348388622877325  
NA -1.3404141274300332 5.497950729512594 -1.3382397125114356  
NA 1.05720195128124 -5.703003593439305 2.367592975659541  
NA 3.2061939274535365 -4.708694129942948 -3.6531081923405075  
NA -2.119626172843738 -5.063872001594967 4.215658775469475  
NA -2.888050902431687 -5.085821295593532 -2.882515396538736  
NA 1.5985058008162525 2.1721244919026104 -6.0551462901977064  
NA 3.1056295058053873 -1.4180801490254085 -5.420398225158158  
NA -2.1806788471562593 1.3618822901115986 -6.722825649811431  
NA -3.092585607664411 -2.2172679913326636 -5.447434992130245  
NA -6.0912615056769415 1.0972794949625753 2.961929890856519  
NA -6.912020161601827 -2.052532697608665 1.0300386100260381  
NA -4.579259474637444 4.1544879611000525 -2.7355711678764894  
NA -5.433874732499932 -2.3447588050354167 -2.284411976663441  
NA 0.07532664251808947 -1.2507291250448265 -7.254455252099753  
NA 4.443082807874254 -4.37484515361986 3.455226184634347  
NA -3.3624503710706537 3.9685804329446315 4.540873964296827  
NA -4.402753549925845 0.8206137004727434 6.2226533124681565  
NA -6.315901449929438 1.2597667261282437 -0.8585819124310815

56

NA -0.1141334617361826 -0.16518816105360154 0.36664571639392446  
NA 2.0026360481071594 2.121244805690588 1.9551697608515324  
NA 3.0334762077047843 -1.6055226525129689 1.643108968674961  
NA 2.181809178185457 1.665585425860243 -1.7752416602280547  
NA 1.7838337369236845 -2.0374865433164016 -1.8488042371560258  
NA -2.019097245577793 1.8991252983848859 2.6970260727689563  
NA -2.7607645759109456 -1.7728021368735034 2.1294740727256194  
NA -3.363212860665063 3.4082592697599723 -3.221919645526152  
NA -1.9966598629077532 -2.689874016538545 -1.5042759161836823  
NA 5.271200227770397 1.26418206735653 3.2216910477186755  
NA 4.675523424898362 3.887209940613786 0.4005228618215285  
NA 4.820165511413105 0.31232241821899476 -0.3269640763865503  
NA 0.33526889797965703 3.8693252225697607 4.494338249006938  
NA 0.48312812114583586 -0.5134155239141415 3.8828340648173723  
NA -0.7420094130190595 3.246549812819414 -0.4568460322943122

NA 5.107091205276455 -3.2852246134652545 -1.0817159155445715  
NA 1.4862796092150865 -3.9317354813748486 4.351770336605481  
NA 0.2806420767767682 -3.6729467850909963 1.06038601961409  
NA 4.491508047580697 -0.763516886007199 -3.8328086026202826  
NA -0.22556070123340838 4.040486524766466 -4.2557735781210075  
NA -0.8660885511560497 0.4232421693459309 -3.0971532136263273  
NA 0.16436509508759123 -4.675638421446046 -3.5202220192631892  
NA -4.417850670125181 -0.0069455382402776634 4.739100134260351  
NA -4.180415973338489 4.3070074233124345 -0.09177027687116998  
NA -3.5175233824447614 0.6929391556317603 -0.5049791514677389  
NA -4.435440770584137 -4.443815328487707 0.5060225251904578  
NA -4.340245021222739 0.27853162628661593 -4.174954648191337  
NA 7.719289227869916 1.8731180236804457 0.5524724398163525  
NA 2.643119348999593 1.4211269318326527 5.832815687359586  
NA 1.4768774732882266 5.576450912595281 1.1687316558274679  
NA 6.744324007188987 -1.7468130096166976 1.826316158950394  
NA 1.2322578153343715 -1.741362790193997 7.163525378893787  
NA 5.542264783520278 2.6363780529716396 -2.8999935504312533  
NA 2.4993508667126996 5.053874658423564 -2.343518597282437  
NA 7.59105629689952 -0.6746596654562775 -1.9128953287410324  
NA -1.1772187712767639 1.101633817028758 6.355324908602865  
NA -1.8682149541136506 5.518991363980287 2.2334001895947035  
NA -1.938253147441697 -2.501901707181519 5.566588542837166  
NA -1.1899410803532238 6.32009975518099 -1.52826639756377  
NA 1.056434150839651 -6.861711315661896 2.4006737608731177  
NA 2.388205365463156 -5.620783737439236 -0.8699125135593377  
NA -2.0745079133326065 -5.321984436149517 3.1192894149307593  
NA -1.3356537719385826 -6.160916167438002 -0.5784350588012046  
NA 2.3759594039241874 1.9006024881679677 -5.167672549487914  
NA 1.1725966048793555 -1.5000327604256658 -5.333925308032249  
NA -1.3814294625261596 1.1802184167100738 -6.281253219824943  
NA -2.222404993620909 -2.3896249641417584 -4.981822901869833  
NA -5.5921305301843365 2.186004008428453 2.235318846065502  
NA -6.243516476719164 -1.1947079656417119 1.4827923202535527  
NA -6.57287086019128 1.6215714734549698 -1.4055101265720626  
NA -5.477998544655978 -2.0371029191601795 -1.8876742527035466  
NA -5.117430490573303 -3.611236432536769 4.068706416127697  
NA -0.5905413609062837 -5.604820498291719 6.357633518145602  
NA 4.217884741287063 -4.730063375386595 2.2385685069003576  
NA 4.2530081476889 -1.7642110595563685 4.892868353089148  
NA 3.748660011770526 4.493464289907855 3.8300921295093833

## References

- [1] M. Grumet, P. Liu, M. Kaltak, J. Klimeš and G. Kresse, *Phys. Rev. B*, 2018, **98**, 155143.
- [2] J. P. Perdew and Y. Wang, *Phys. Rev. B*, 1992, **45**, 13244.
